# Supplementary material for: Association of Urban Green Space With Mental Health and General Health Among Adults in Australia
Source: PubMed Central journal article supplement (PMC6661720; doi:10.1001/jamanetworkopen.2019.8209), 2019-07-26
Supplement: jamanetwopen-2-e198209-s001.pdf [file jamanetwopen-2-e198209-s001.pdf]

## Supplementary Online Content

Astell-Burt T, Feng X. Association of urban green space with mental health and general health among adults in Australia. *JAMA Netw Open*. 2019;2(7):e198209.  
doi:10.1001/jamanetworkopen.2019.8209

**eFigure.** Flowchart for the Sample

**eTable 1.** Cross-tabulation of Missing Kessler 10 Psychological Distress Scale Data at Baseline and Follow-up

**eTable 2.** Cross-tabulation of Missing Self-reported Physician-Diagnosed Depression or Anxiety Data at Baseline and Follow-up

**eTable 3.** Cross-tabulation of Missing Self-rated Fair or Poor General Health Data at Baseline and Follow-up

**eTable 4.** Associations Between Total Green Space, Green Space Type, and Prevalent Kessler 10 Psychological Distress Adjusted for Confounding in Multilevel Logistic Regressions Estimated With Markov Chain Monte Carlo (MCMC)

**eTable 5.** Associations Between Total Green Space, Green Space Type, and Incident Kessler 10 Psychological Distress Adjusted for Confounding in Multilevel Logistic Regressions Estimated With Markov Chain Monte Carlo (MCMC)

**eTable 6.** Associations Between Total Green Space, Green Space Type, and Prevalent Self-reported Physician-Diagnosed Depression or Anxiety Adjusted for Confounding in Multilevel Logistic Regressions Estimated With Markov Chain Monte Carlo (MCMC)

**eTable 7.** Associations Between Total Green Space, Green Space Type, and Incident Self-reported Physician-Diagnosed Depression or Anxiety Adjusted for Confounding in Multilevel Logistic Regressions Estimated With Markov Chain Monte Carlo (MCMC)

**eTable 8.** Associations Between Total Green Space, Green Space Type, and Prevalent Missing Self-rated Fair or Poor General Health Adjusted for Confounding in Multilevel Logistic Regressions Estimated With Markov Chain Monte Carlo (MCMC)

**eTable 9.** Associations Between Total Green Space, Green Space Type, and Incident Missing Self-rated Fair or Poor General Health Adjusted for Confounding in Multilevel Logistic Regressions Estimated With Markov Chain Monte Carlo (MCMC)

This supplementary material has been provided by the authors to give readers additional information about their work.

eFigure. Flowchart for the Sample

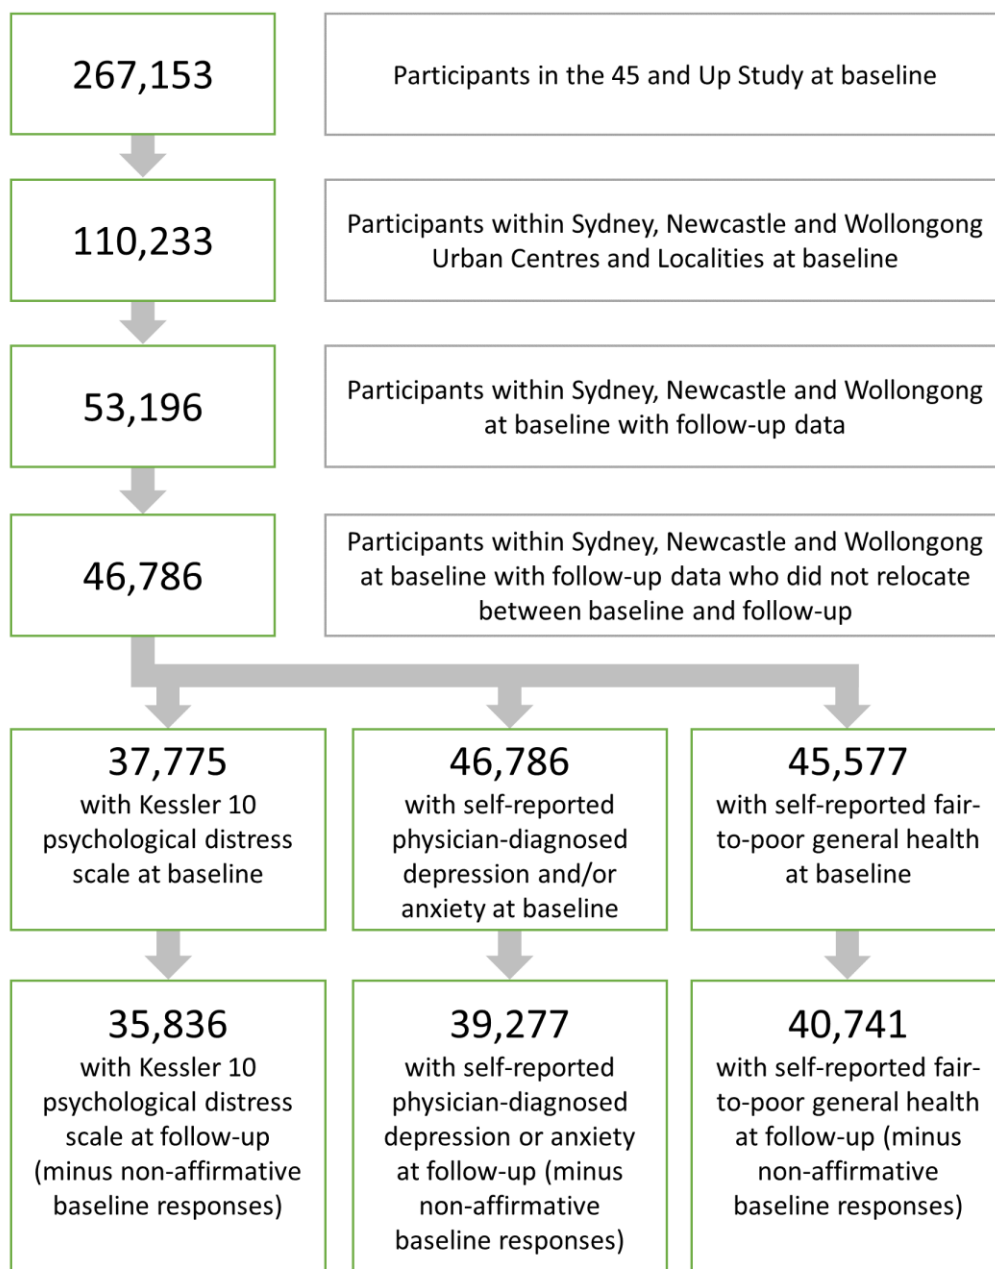

eTable 1: Cross-tabulation of missing Kessler 10 Psychological Distress Scale data at baseline and follow-up

|                                   | 10-item Kessler Psychological Distress Scale |                                   |
|-----------------------------------|----------------------------------------------|-----------------------------------|
|                                   | Prevalence                                   | Incidence                         |
| Total (% missing responses)       | 46786 (19.26%)                               | 35836 (7.94%)                     |
|                                   |                                              |                                   |
|                                   | Subtotal (% affirmative responses, 95%CI)    |                                   |
| Gender                            |                                              |                                   |
| Male                              | 21,633 (18.51%, 18.00% to 19.03%)            | 16,857 (7.44%, 7.06% to 7.85%)    |
| Female                            | 25,153 (19.91%, 19.42% to 20.40%)            | 18,979 (8.38%, 7.99% to 8.78%)    |
| Chi-square (p-value)              | 14.60 (p<0.001)                              | 10.63 (p=0.001)                   |
|                                   |                                              |                                   |
| Age group                         |                                              |                                   |
| 45-54y                            | 15,443 (16.98%, 16.39% to 17.58%)            | 11,902 (4.13%, 3.78% to 4.50%)    |
| 55-64y                            | 16,604 (17.57%, 17.00% to 18.16%)            | 13,003 (5.78%, 5.39% to 6.19%)    |
| 65-74y                            | 9,178 (21.25%, 20.42% to 22.10%)             | 7,015 (11.46%, 10.74% to 12.23%)  |
| ≥75y                              | 5,561 (27.35%, 26.20% to 28.54%)             | 3,916 (20.40%, 19.17% to 21.69%)  |
| Chi-square (p-value)              | 339.44 (p<0.001)                             | 1,300.00 (p<0.001)                |
|                                   |                                              |                                   |
| Annual household income           |                                              |                                   |
| \$0-\$19,999                      | 5,573 (26.63%, 25.48% to 27.81%)             | 3,660 (15.79%, 14.65% to 17.01%)  |
| \$20,000-\$29,999                 | 3,261 (23.03%, 21.62% to 24.51%)             | 2,356 (11.54%, 10.32% to 12.90%)  |
| \$30,000-\$39,999                 | 3,114 (20.71%, 19.33% to 22.17%)             | 2,325 (9.42%, 8.30% to 10.68%)    |
| \$40,000-\$49,999                 | 3,190 (19.37%, 18.04% to 20.78%)             | 2,452 (7.71%, 6.72% to 8.83%)     |
| \$50,000-\$69,999                 | 5,347 (18.72%, 17.70% to 19.79%)             | 4,151 (5.28%, 4.64% to 6.00%)     |
| \$70,000+                         | 17,611 (14.42%, 13.91% to 14.94%)            | 14,518 (4.32%, 4.00% to 4.66%)    |
| Not stated                        | 8,690 (22.70%, 21.84% to 23.60%)             | 6,374 (11.63%, 10.86% to 12.44%)  |
| Chi-square (p-value)              | 561.53 (p<0.001)                             | 777.05 (p<0.001)                  |
|                                   |                                              |                                   |
| Highest educational qualification |                                              |                                   |
| None                              | 2,927 (28.15%, 26.55% to 29.81%)             | 1,893 (15.64%, 14.07% to 17.34%)  |
| School                            | 8,054 (22.80%, 21.89% to 23.73%)             | 5,850 (10.97%, 10.20% to 11.80%)  |
| High school                       | 4,419 (20.14%, 18.98% to 21.35%)             | 3,327 (7.81%, 6.95% to 8.78%)     |
| Trade                             | 4,170 (21.49%, 20.27% to 22.76%)             | 3,100 (10.90%, 9.85% to 12.05%)   |
| Certificate/Diploma               | 10,366 (18.20%, 17.47% to 18.96%)            | 8,067 (6.79%, 6.26% to 7.36%)     |
| University                        | 16,398 (15.58%, 15.03% to 16.14%)            | 13,300 (5.37%, 5.00% to 5.76%)    |
| Not stated                        | 452 (27.21%, 23.30% to 31.51%)               | 299 (15.72%, 12.01% to 20.31%)    |
| Chi-square (p-value)              | 397.61 (p<0.001)                             | 424.06 (p<0.001)                  |
|                                   |                                              |                                   |
| Economic status                   |                                              |                                   |
| Employed                          | 26,040 (16.72%, 16.27% to 17.18%)            | 20,676 (4.87%, 4.59% to 5.17%)    |
| Retired                           | 16,762 (21.90%, 21.28% to 22.53%)            | 12,604 (12.51%, 11.95% to 13.10%) |
| Unemployed                        | 645 (21.40%, 18.40% to 24.73%)               | 410 (10.49%, 7.87% to 13.85%)     |
| Unpaid work                       | 663 (23.23%, 20.17% to 26.60%)               | 472 (9.11%, 6.82% to 12.06%)      |
| Disabled                          | 566 (23.85%, 20.52% to 27.54%)               | 264 (10.23%, 7.10% to 14.51%)     |
| Homemaker                         | 1,541 (24.01%, 21.94% to 26.21%)             | 1,072 (9.05%, 7.47% to 10.92%)    |
| Other (e.g. study)                | 569 (33.22%, 29.46% to 37.20%)               | 338 (15.09%, 11.65% to 19.32%)    |

|                                |                                   |                                 |
|--------------------------------|-----------------------------------|---------------------------------|
| Chi-square (p-value)           | 293.07 (p<0.001)                  | 658.88 (p<0.001)                |
|                                |                                   |                                 |
| Couple status                  |                                   |                                 |
| Not in a couple                | 10,236 (21.86%, 21.07% to 22.68%) | 7,336 (10.41%, 9.74% to 11.13%) |
| In a couple                    | 36,550 (18.53%, 18.14% to 18.93%) | 28,500 (7.30%, 7.01% to 7.61%)  |
| Chi-square (p-value)           | 57.13 (p<0.001)                   | 77.34 (p<0.001)                 |
|                                |                                   |                                 |
| Total green space              |                                   |                                 |
| 0-4%                           | 741 (20.92%, 18.14% to 24.00%)    | 541 (9.24%, 7.07% to 11.99%)    |
| 5-9%                           | 11,056 (19.45%, 18.72% to 20.19%) | 8,402 (8.18%, 7.61% to 8.78%)   |
| 10-19%                         | 12,455 (19.85%, 19.16% to 20.56%) | 9,450 (8.23%, 7.70% to 8.80%)   |
| 20-29%                         | 12,712 (19.01%, 18.33% to 19.70%) | 9,757 (8.19%, 7.66% to 8.75%)   |
| ≥30%                           | 9,822 (18.51%, 17.75% to 19.29%)  | 7,686 (6.91%, 6.36% to 7.50%)   |
| Chi-square (p-value)           | 8.41 (p<0.001)                    | 15.02 (p=0.005)                 |
|                                |                                   |                                 |
| Tree canopy                    |                                   |                                 |
| 0-9%                           | 4,972 (20.90%, 19.79% to 22.05%)  | 3,603 (8.88%, 8.00% to 9.86%)   |
| 10-19%                         | 18,041 (20.17%, 19.59% to 20.76%) | 13,543 (8.44%, 7.98% to 8.92%)  |
| 20-29%                         | 11,816 (18.67%, 17.98% to 19.38%) | 9,186 (8.01%, 7.47% to 8.59%)   |
| ≥30%                           | 11,957 (17.80%, 17.12% to 18.49%) | 9,504 (6.80%, 6.31% to 7.32%)   |
| Chi-square (p-value)           | 37.18 (p<0.001)                   | 26.05 (p<0.001)                 |
|                                |                                   |                                 |
| Grass                          |                                   |                                 |
| 0-4%                           | 5,706 (18.14%, 17.16% to 19.16%)  | 4,496 (7.10%, 6.38% to 7.88%)   |
| 5-9%                           | 19,359 (18.43%, 17.89% to 18.98%) | 15,120 (7.74%, 7.32% to 8.17%)  |
| 10-19%                         | 12,072 (20.09%, 19.38% to 20.81%) | 9,071 (7.93%, 7.39% to 8.50%)   |
| 20-29%                         | 7,611 (20.65%, 19.76% to 21.58%)  | 5,652 (9.04%, 8.32% to 9.82%)   |
| ≥30%                           | 2,038 (20.22%, 18.53% to 22.02%)  | 1,497 (8.42%, 7.11% to 9.93%)   |
| Chi-square (p-value)           | 29.31 (p<0.001)                   | 15.08 (p=0.005)                 |
|                                |                                   |                                 |
| Low-lying vegetation           |                                   |                                 |
| 0-4%                           | 29,840 (18.94%, 18.50% to 19.39%) | 22,960 (7.98%, 7.64% to 8.34%)  |
| 5-9%                           | 15,366 (19.78%, 19.16% to 20.42%) | 11,681 (7.94%, 7.47% to 8.45%)  |
| ≥10%                           | 1,580 (20.19%, 18.28% to 22.24%)  | 1,195 (7.03%, 5.71% to 8.62%)   |
| Chi-square (p-value)           | 5.54 (p=0.063)                    | 1.42 (p=0.493)                  |
|                                |                                   |                                 |
| 95%CI: 95% Confidence Interval |                                   |                                 |

eTable 2: Cross-tabulation of missing self-reported physician-diagnosed depression or anxiety data at baseline and follow-up

|                                   | Self-reported physician-diagnosed depression or anxiety |                                |
|-----------------------------------|---------------------------------------------------------|--------------------------------|
|                                   | Prevalence                                              | Incidence                      |
| Total (% missing responses)       | 46786 (0.00%)                                           | 39277 (0.02%)                  |
|                                   | Subtotal (% affirmative responses, 95%CI)               |                                |
| Gender                            |                                                         |                                |
| Male                              | 21,633 (0.00%)                                          | 19,155 (0.03%, 0.01% to 0.06%) |
| Female                            | 25,153 (0.00%)                                          | 20,130 (0.01%, 0.00% to 0.05%) |
| Chi-square (p-value)              | .                                                       | 0.60 (p=0.437)                 |
| Age group                         |                                                         |                                |
| 45-54y                            | 15,443 (0.00%)                                          | 12,527 (0.01%, 0.00% to 0.06%) |
| 55-64y                            | 16,604 (0.00%)                                          | 13,809 (0.01%, 0.00% to 0.06%) |
| 65-74y                            | 9,178 (0.00%)                                           | 7,954 (0.03%, 0.01% to 0.10%)  |
| ≥75y                              | 5,561 (0.00%)                                           | 4,995 (0.06%, 0.02% to 0.19%)  |
| Chi-square (p-value)              | .                                                       | 5.13 (p=0.162)                 |
| Annual household income           |                                                         |                                |
| \$0-\$19,999                      | 5,573 (0.00%)                                           | 4,441 (0.07%, 0.02% to 0.21%)  |
| \$20,000-\$29,999                 | 3,261 (0.00%)                                           | 2,703 (0.00%)                  |
| \$30,000-\$39,999                 | 3,114 (0.00%)                                           | 2,578 (0.08%, 0.02% to 0.31%)  |
| \$40,000-\$49,999                 | 3,190 (0.00%)                                           | 2,678 (0.00%)                  |
| \$50,000-\$69,999                 | 5,347 (0.00%)                                           | 4,468 (0.00%)                  |
| \$70,000+                         | 17,611 (0.00%)                                          | 14,976 (0.01%, 0.00% to 0.05%) |
| Not stated                        | 8,690 (0.00%)                                           | 7,441 (0.03%, 0.01% to 0.11%)  |
| Chi-square (p-value)              | .                                                       | 12.54 (p=0.051)                |
| Highest educational qualification |                                                         |                                |
| None                              | 2,927 (0.00%)                                           | 2,374 (0.08%, 0.02% to 0.34%)  |
| School                            | 8,054 (0.00%)                                           | 6,732 (0.01%, 0.00% to 0.11%)  |
| High school                       | 4,419 (0.00%)                                           | 3,730 (0.03%, 0.00% to 0.19%)  |
| Trade                             | 4,170 (0.00%)                                           | 3,656 (0.05%, 0.01% to 0.22%)  |
| Certificate/Diploma               | 10,366 (0.00%)                                          | 8,606 (0.01%, 0.00% to 0.08%)  |
| University                        | 16,398 (0.00%)                                          | 13,812 (0.01%, 0.00% to 0.05%) |
| Not stated                        | 452 (0.00%)                                             | 375 (0.00%)                    |
| Chi-square (p-value)              | .                                                       | 8.62 (p=0.196)                 |
| Economic status                   |                                                         |                                |
| Employed                          | 26,040 (0.00%)                                          | 21,938 (0.01%, 0.00% to 0.04%) |
| Retired                           | 16,762 (0.00%)                                          | 14,355 (0.03%, 0.01% to 0.08%) |
| Unemployed                        | 645 (0.00%)                                             | 470 (0.00%)                    |
| Unpaid work                       | 663 (0.00%)                                             | 536 (0.00%)                    |
| Disabled                          | 566 (0.00%)                                             | 289 (0.35%, 0.05% to 2.42%)    |
| Homemaker                         | 1,541 (0.00%)                                           | 1,242 (0.00%)                  |
| Other (e.g. study)                | 569 (0.00%)                                             | 455 (0.00%)                    |
| Chi-square (p-value)              | .                                                       | 18.44 (p=0.005)                |

|                                |                |                                |
|--------------------------------|----------------|--------------------------------|
|                                |                |                                |
| Couple status                  |                |                                |
| Not in a couple                | 10,236 (0.00%) | 7,952 (0.05%, 0.02% to 0.13%)  |
| In a couple                    | 36,550 (0.00%) | 31,333 (0.01%, 0.00% to 0.03%) |
| Chi-square (p-value)           | .              | 4.39 (p=0.036)                 |
|                                |                |                                |
| Total green space              |                |                                |
| 0-4%                           | 741 (0.00%)    | 604 (0.00%)                    |
| 5-9%                           | 11,056 (0.00%) | 9,204 (0.01%, 0.00% to 0.08%)  |
| 10-19%                         | 12,455 (0.00%) | 10,513 (0.05%, 0.02% to 0.11%) |
| 20-29%                         | 12,712 (0.00%) | 10,652 (0.01%, 0.00% to 0.07%) |
| ≥30%                           | 9,822 (0.00%)  | 8,312 (0.01%, 0.00% to 0.09%)  |
| Chi-square (p-value)           | .              | 5.26 (p=0.261)                 |
|                                |                |                                |
| Tree canopy                    |                |                                |
| 0-9%                           | 4,972 (0.00%)  | 4,106 (0.05%, 0.01% to 0.19%)  |
| 10-19%                         | 18,041 (0.00%) | 14,954 (0.02%, 0.01% to 0.06%) |
| 20-29%                         | 11,816 (0.00%) | 9,990 (0.02%, 0.01% to 0.08%)  |
| ≥30%                           | 11,957 (0.00%) | 10,235 (0.01%, 0.00% to 0.07%) |
| Chi-square (p-value)           | .              | 2.19 (p=0.535)                 |
|                                |                |                                |
| Grass                          |                |                                |
| 0-4%                           | 5,706 (0.00%)  | 4,788 (0.02%, 0.00% to 0.15%)  |
| 5-9%                           | 19,359 (0.00%) | 16,436 (0.02%, 0.01% to 0.06%) |
| 10-19%                         | 12,072 (0.00%) | 10,136 (0.02%, 0.00% to 0.08%) |
| 20-29%                         | 7,611 (0.00%)  | 6,275 (0.03%, 0.01% to 0.13%)  |
| ≥30%                           | 2,038 (0.00%)  | 1,650 (0.00%)                  |
| Chi-square (p-value)           | .              | 0.78 (p=0.941)                 |
|                                |                |                                |
| Low-lying vegetation           |                |                                |
| 0-4%                           | 29,840 (0.00%) | 25,102 (0.02%, 0.01% to 0.05%) |
| 5-9%                           | 15,366 (0.00%) | 12,850 (0.02%, 0.01% to 0.07%) |
| ≥10%                           | 1,580 (0.00%)  | 1,333 (0.00%)                  |
| Chi-square (p-value)           | .              | 0.33 (p=0.848)                 |
|                                |                |                                |
| 95%CI: 95% Confidence Interval |                |                                |

eTable 3: Cross-tabulation of missing self-rated fair or poor general health data at baseline and follow-up

|                                   | Self-rated fair or poor general health    |                                |
|-----------------------------------|-------------------------------------------|--------------------------------|
|                                   | Prevalence                                | Incidence                      |
| Total (% missing responses)       | 46786 (2.58%)                             | 41494 (1.81%)                  |
|                                   | Subtotal (% affirmative responses, 95%CI) |                                |
| Gender                            |                                           |                                |
| Male                              | 21,633 (2.16%, 1.97% to 2.36%)            | 19,205 (2.28%, 2.08% to 2.50%) |
| Female                            | 25,153 (2.95%, 2.75% to 3.17%)            | 22,289 (1.41%, 1.27% to 1.58%) |
| Chi-square (p-value)              | 28.92 (p<0.001)                           | 43.56 (p<0.001)                |
| Age group                         |                                           |                                |
| 45-54y                            | 15,443 (2.10%, 1.88% to 2.34%)            | 13,935 (0.82%, 0.68% to 0.98%) |
| 55-64y                            | 16,604 (2.43%, 2.21% to 2.68%)            | 14,869 (1.33%, 1.16% to 1.53%) |
| 65-74y                            | 9,178 (2.72%, 2.41% to 3.08%)             | 8,072 (2.58%, 2.25% to 2.95%)  |
| ≥75y                              | 5,561 (4.15%, 3.66% to 4.71%)             | 4,618 (5.05%, 4.45% to 5.72%)  |
| Chi-square (p-value)              | 71.15 (p<0.001)                           | 393.99 (p<0.001)               |
| Annual household income           |                                           |                                |
| \$0-\$19,999                      | 5,573 (2.60%, 2.21% to 3.05%)             | 4,316 (3.38%, 2.88% to 3.97%)  |
| \$20,000-\$29,999                 | 3,261 (1.72%, 1.32% to 2.23%)             | 2,813 (2.56%, 2.04% to 3.21%)  |
| \$30,000-\$39,999                 | 3,114 (1.51%, 1.14% to 2.00%)             | 2,809 (1.96%, 1.51% to 2.54%)  |
| \$40,000-\$49,999                 | 3,190 (1.19%, 0.87% to 1.63%)             | 2,893 (1.69%, 1.28% to 2.23%)  |
| \$50,000-\$69,999                 | 5,347 (0.92%, 0.69% to 1.21%)             | 4,929 (1.48%, 1.18% to 1.86%)  |
| \$70,000+                         | 17,611 (0.61%, 0.50% to 0.73%)            | 16,647 (1.11%, 0.96% to 1.28%) |
| Not stated                        | 8,690 (8.83%, 8.25% to 9.44%)             | 7,087 (2.46%, 2.12% to 2.84%)  |
| Chi-square (p-value)              | 1,700.00 (p<0.001)                        | 135.29 (p<0.001)               |
| Highest educational qualification |                                           |                                |
| None                              | 2,927 (4.85%, 4.13% to 5.69%)             | 2,246 (3.03%, 2.39% to 3.82%)  |
| School                            | 8,054 (3.23%, 2.86% to 3.64%)             | 6,904 (2.06%, 1.75% to 2.42%)  |
| High school                       | 4,419 (2.76%, 2.32% to 3.29%)             | 3,833 (2.01%, 1.61% to 2.50%)  |
| Trade                             | 4,170 (2.37%, 1.95% to 2.88%)             | 3,593 (2.28%, 1.84% to 2.83%)  |
| Certificate/Diploma               | 10,366 (2.05%, 1.80% to 2.35%)            | 9,391 (1.61%, 1.37% to 1.88%)  |
| University                        | 16,398 (2.06%, 1.85% to 2.28%)            | 15,170 (1.44%, 1.27% to 1.65%) |
| Not stated                        | 452 (7.96%, 5.80% to 10.85%)              | 357 (3.92%, 2.33% to 6.52%)    |
| Chi-square (p-value)              | 156.07 (p<0.001)                          | 48.90 (p<0.001)                |
| Economic status                   |                                           |                                |
| Employed                          | 26,040 (2.14%, 1.97% to 2.33%)            | 23,964 (1.19%, 1.06% to 1.33%) |
| Retired                           | 16,762 (2.98%, 2.73% to 3.25%)            | 14,465 (2.83%, 2.58% to 3.12%) |
| Unemployed                        | 645 (4.50%, 3.14% to 6.40%)               | 479 (1.88%, 0.98% to 3.57%)    |
| Unpaid work                       | 663 (2.56%, 1.60% to 4.09%)               | 595 (1.51%, 0.79% to 2.88%)    |
| Disabled                          | 566 (4.77%, 3.29% to 6.87%)               | 215 (2.79%, 1.26% to 6.08%)    |
| Homemaker                         | 1,541 (2.79%, 2.08% to 3.74%)             | 1,328 (1.58%, 1.03% to 2.41%)  |
| Other (e.g. study)                | 569 (6.33%, 4.60% to 8.65%)               | 448 (2.90%, 1.69% to 4.94%)    |
| Chi-square (p-value)              | 82.46 (p<0.001)                           | 141.87 (p<0.001)               |

|                                |                                |                                |
|--------------------------------|--------------------------------|--------------------------------|
| Couple status                  |                                |                                |
| Not in a couple                | 10,236 (3.52%, 3.18% to 3.89%) | 8,587 (2.24%, 1.94% to 2.57%)  |
| In a couple                    | 36,550 (2.32%, 2.17% to 2.48%) | 32,907 (1.70%, 1.57% to 1.85%) |
| Chi-square (p-value)           | 45.30 (p<0.001)                | 10.78 (p=0.001)                |
| Total green space              |                                |                                |
| 0-4%                           | 741 (2.56%, 1.64% to 3.99%)    | 628 (2.71%, 1.69% to 4.31%)    |
| 5-9%                           | 11,056 (2.91%, 2.61% to 3.24%) | 9,689 (1.88%, 1.63% to 2.17%)  |
| 10-19%                         | 12,455 (2.83%, 2.56% to 3.14%) | 10,953 (2.16%, 1.91% to 2.45%) |
| 20-29%                         | 12,712 (2.27%, 2.03% to 2.55%) | 11,278 (1.70%, 1.48% to 1.96%) |
| ≥30%                           | 9,822 (2.30%, 2.02% to 2.62%)  | 8,946 (1.40%, 1.17% to 1.66%)  |
| Chi-square (p-value)           | 15.83 (p=0.003)                | 20.06 (p<0.001)                |
| Tree canopy                    |                                |                                |
| 0-9%                           | 4,972 (3.04%, 2.59% to 3.55%)  | 4,135 (1.91%, 1.53% to 2.38%)  |
| 10-19%                         | 18,041 (2.93%, 2.69% to 3.18%) | 15,617 (1.97%, 1.77% to 2.20%) |
| 20-29%                         | 11,816 (2.46%, 2.20% to 2.76%) | 10,684 (1.93%, 1.68% to 2.21%) |
| ≥30%                           | 11,957 (2.00%, 1.76% to 2.27%) | 11,058 (1.45%, 1.24% to 1.69%) |
| Chi-square (p-value)           | 29.42 (p<0.001)                | 11.55 (p=0.009)                |
| Grass                          |                                |                                |
| 0-4%                           | 5,706 (2.54%, 2.16% to 2.98%)  | 5,212 (1.40%, 1.11% to 1.76%)  |
| 5-9%                           | 19,359 (2.55%, 2.34% to 2.78%) | 17,466 (1.85%, 1.66% to 2.06%) |
| 10-19%                         | 12,072 (2.44%, 2.18% to 2.73%) | 10,592 (1.95%, 1.71% to 2.24%) |
| 20-29%                         | 7,611 (2.92%, 2.56% to 3.32%)  | 6,491 (1.86%, 1.56% to 2.22%)  |
| ≥30%                           | 2,038 (2.65%, 2.03% to 3.44%)  | 1,733 (1.67%, 1.17% to 2.40%)  |
| Chi-square (p-value)           | 4.56 (p=0.335)                 | 6.57 (p=0.160)                 |
| Low-lying vegetation           |                                |                                |
| 0-4%                           | 29,840 (2.55%, 2.37% to 2.73%) | 26,538 (1.88%, 1.73% to 2.05%) |
| 5-9%                           | 15,366 (2.66%, 2.41% to 2.92%) | 13,568 (1.72%, 1.52% to 1.96%) |
| ≥10%                           | 1,580 (2.59%, 1.92% to 3.51%)  | 1,388 (1.37%, 0.87% to 2.14%)  |
| Chi-square (p-value)           | 0.47 (p=0.789)                 | 2.88 (p=0.237)                 |
| 95%CI: 95% Confidence Interval |                                |                                |



eTable 4: Associations between total green space, green space type, and prevalent Kessler 10 psychological distress adjusted for confounding in multilevel logistic regressions estimated with Markov Chain Monte Carlo (MCMC)

|                               | 10-item Kessler Psychological Distress Scale (prevalence) |                               |                               |                               |
|-------------------------------|-----------------------------------------------------------|-------------------------------|-------------------------------|-------------------------------|
|                               | Model 1                                                   | Model 2                       | Model 3                       | Model 4                       |
|                               | Total green space                                         | Tree canopy                   | Grass                         | Low-lying vegetation          |
|                               | Odds Ratio (95% Confidence Interval) [p-value]            |                               |                               |                               |
| Total green space (ref: 0-4%) |                                                           |                               |                               |                               |
| 5-9%                          | 0.82 (0.58 to 1.18) [p=0.12]                              |                               |                               |                               |
| 10-19%                        | 0.80 (0.56 to 1.17) [p=0.11]                              |                               |                               |                               |
| 20-29%                        | 0.79 (0.55 to 1.15) [p=0.09]                              |                               |                               |                               |
| ≥30%                          | 0.69 (0.47 to 1.02) [p=0.03]                              |                               |                               |                               |
| Tree canopy (ref: 0-9%)       |                                                           |                               |                               |                               |
| 10-19%                        |                                                           | 0.81 (0.70 to 0.94) [p=0.003] |                               |                               |
| 20-29%                        |                                                           | 0.73 (0.61 to 0.87) [p=0.001] |                               |                               |
| ≥30%                          |                                                           | 0.61 (0.50 to 0.74) [p<0.001] |                               |                               |
| Grass (ref: 0-4%)             |                                                           |                               |                               |                               |
| 5-9%                          |                                                           |                               | 1.13 (0.93 to 1.35) [p=0.12]  |                               |
| 10-19%                        |                                                           |                               | 1.38 (1.11 to 1.70) [p=0.001] |                               |
| 20-29%                        |                                                           |                               | 1.27 (0.99 to 1.60) [p=0.03]  |                               |
| ≥30%                          |                                                           |                               | 1.71 (1.25 to 2.28) [p<0.001] |                               |
| Low-lying vegetation (0-4%)   |                                                           |                               |                               |                               |
| 5-9%                          |                                                           |                               |                               | 0.97 (0.86 to 1.08) [p=0.26]  |
| ≥10%                          |                                                           |                               |                               | 0.97 (0.72 to 1.26) [p=0.39]  |
| Age group (ref: 45-54y)       |                                                           |                               |                               |                               |
| 55-64y                        | 0.55 (0.49 to 0.61) [p<0.001]                             | 0.55 (0.49 to 0.62) [p<0.001] | 0.55 (0.49 to 0.62) [p<0.001] | 0.55 (0.49 to 0.62) [p<0.001] |

|                                               |                               |                               |                               |                               |
|-----------------------------------------------|-------------------------------|-------------------------------|-------------------------------|-------------------------------|
| 65-74y                                        | 0.27 (0.22 to 0.32) [p<0.001] | 0.27 (0.22 to 0.32) [p<0.001] | 0.27 (0.22 to 0.32) [p<0.001] | 0.27 (0.22 to 0.32) [p<0.001] |
| ≥75y                                          | 0.22 (0.17 to 0.28) [p<0.001] | 0.23 (0.18 to 0.28) [p<0.001] | 0.23 (0.18 to 0.29) [p<0.001] | 0.22 (0.18 to 0.28) [p<0.001] |
|                                               |                               |                               |                               |                               |
| Gender (ref: Male)                            |                               |                               |                               |                               |
| Female                                        | 1.06 (0.95 to 1.17) [p=0.14]  | 1.06 (0.96 to 1.18) [p=0.12]  | 1.06 (0.95 to 1.17) [p=0.15]  | 1.06 (0.95 to 1.17) [p=0.15]  |
|                                               |                               |                               |                               |                               |
| Annual household income (ref: \$0-\$19,999)   |                               |                               |                               |                               |
| \$20,000-\$29,999                             | 0.77 (0.63 to 0.95) [p=0.007] | 0.77 (0.63 to 0.94) [p=0.004] | 0.77 (0.62 to 0.94) [p=0.005] | 0.77 (0.62 to 0.93) [p=0.004] |
| \$30,000-\$39,999                             | 0.72 (0.58 to 0.89) [p=0.001] | 0.72 (0.58 to 0.88) [p=0.001] | 0.72 (0.58 to 0.89) [p=0.001] | 0.72 (0.58 to 0.88) [p=0.001] |
| \$40,000-\$49,999                             | 0.54 (0.42 to 0.67) [p<0.001] | 0.54 (0.43 to 0.67) [p<0.001] | 0.53 (0.42 to 0.66) [p<0.001] | 0.53 (0.42 to 0.66) [p<0.001] |
| \$50,000-\$69,999                             | 0.49 (0.40 to 0.60) [p<0.001] | 0.49 (0.40 to 0.59) [p<0.001] | 0.49 (0.40 to 0.60) [p<0.001] | 0.49 (0.40 to 0.59) [p<0.001] |
| \$70,000+                                     | 0.41 (0.34 to 0.49) [p<0.001] | 0.41 (0.35 to 0.49) [p<0.001] | 0.41 (0.34 to 0.49) [p<0.001] | 0.41 (0.34 to 0.49) [p<0.001] |
| Not stated                                    | 0.56 (0.47 to 0.66) [p<0.001] | 0.56 (0.47 to 0.66) [p<0.001] | 0.56 (0.47 to 0.66) [p<0.001] | 0.55 (0.47 to 0.65) [p<0.001] |
|                                               |                               |                               |                               |                               |
| Highest educational qualification (ref: None) |                               |                               |                               |                               |
| School                                        | 0.69 (0.57 to 0.84) [p<0.001] | 0.71 (0.58 to 0.86) [p<0.001] | 0.70 (0.57 to 0.84) [p<0.001] | 0.69 (0.57 to 0.84) [p<0.001] |
| High school                                   | 0.69 (0.55 to 0.85) [p<0.001] | 0.71 (0.56 to 0.88) [p=0.001] | 0.70 (0.56 to 0.87) [p<0.001] | 0.69 (0.55 to 0.86) [p<0.001] |
| Trade                                         | 0.69 (0.55 to 0.86) [p=0.001] | 0.71 (0.56 to 0.88) [p=0.001] | 0.70 (0.56 to 0.88) [p=0.001] | 0.69 (0.55 to 0.86) [p=0.001] |
| Certificate/Diploma                           | 0.64 (0.53 to 0.78) [p<0.001] | 0.66 (0.54 to 0.80) [p<0.001] | 0.65 (0.53 to 0.79) [p<0.001] | 0.64 (0.53 to 0.77) [p<0.001] |
| University                                    | 0.60 (0.49 to 0.73) [p<0.001] | 0.62 (0.51 to 0.76) [p<0.001] | 0.62 (0.50 to 0.75) [p<0.001] | 0.60 (0.49 to 0.73) [p<0.001] |
| Not stated                                    | 1.16 (0.74 to 1.72) [p=0.28]  | 1.19 (0.75 to 1.76) [p=0.25]  | 1.17 (0.73 to 1.74) [p=0.27]  | 1.16 (0.73 to 1.72) [p=0.27]  |
|                                               |                               |                               |                               |                               |
| Economic status (ref: Employed)               |                               |                               |                               |                               |
| Retired                                       | 1.18 (1.01 to 1.38) [p=0.019] | 1.18 (1.02 to 1.37) [p=0.016] | 1.18 (1.01 to 1.36) [p=0.021] | 1.18 (1.01 to 1.36) [p=0.021] |
| Unemployed                                    | 3.17 (2.44 to 4.02) [p<0.001] | 3.19 (2.46 to 4.07) [p<0.001] | 3.18 (2.45 to 4.04) [p<0.001] | 3.18 (2.45 to 4.03) [p<0.001] |
| Unpaid work                                   | 1.72 (1.17 to 2.38) [p=0.003] | 1.72 (1.18 to 2.40) [p=0.003] | 1.71 (1.16 to 2.37) [p=0.003] | 1.71 (1.18 to 2.36) [p=0.003] |
| Disabled                                      | 6.80 (5.33 to 8.52) [p<0.001] | 6.73 (5.28 to 8.44) [p<0.001] | 6.89 (5.41 to 8.66) [p<0.001] | 6.84 (5.37 to 8.57) [p<0.001] |
| Homemaker                                     | 1.74 (1.37 to 2.16) [p<0.001] | 1.74 (1.36 to 2.17) [p<0.001] | 1.74 (1.37 to 2.17) [p<0.001] | 1.74 (1.37 to 2.16) [p<0.001] |
| Other (e.g. study)                            | 2.21 (1.53 to 3.07) [p<0.001] | 2.22 (1.53 to 3.08) [p<0.001] | 2.22 (1.52 to 3.05) [p<0.001] | 2.21 (1.52 to 3.05) [p<0.001] |
|                                               |                               |                               |                               |                               |

|                                      |                               |                               |                               |                               |
|--------------------------------------|-------------------------------|-------------------------------|-------------------------------|-------------------------------|
| Couple status (ref: Not in a couple) |                               |                               |                               |                               |
| In a couple                          | 0.60 (0.54 to 0.67) [p<0.001] | 0.61 (0.54 to 0.68) [p<0.001] | 0.59 (0.53 to 0.66) [p<0.001] | 0.60 (0.54 to 0.67) [p<0.001] |
|                                      |                               |                               |                               |                               |
|                                      |                               |                               |                               |                               |

eTable 5: Associations between total green space, green space type, and incident Kessler 10 psychological distress adjusted for confounding in multilevel logistic regressions estimated with Markov Chain Monte Carlo (MCMC)

|                               | 10-item Kessler Psychological Distress Scale (incidence) |                               |                               |                               |
|-------------------------------|----------------------------------------------------------|-------------------------------|-------------------------------|-------------------------------|
|                               | Model 5                                                  | Model 6                       | Model 7                       | Model 8                       |
|                               | Total green space                                        | Tree canopy                   | Grass                         | Low-lying vegetation          |
|                               | Odds Ratio (95% Confidence Interval) [p-value]           |                               |                               |                               |
| Total green space (ref: 0-4%) |                                                          |                               |                               |                               |
| 5-9%                          | 0.54 (0.36 to 0.80) [p=0.003]                            |                               |                               |                               |
| 10-19%                        | 0.53 (0.35 to 0.79) [p=0.003]                            |                               |                               |                               |
| 20-29%                        | 0.50 (0.33 to 0.75) [p<0.001]                            |                               |                               |                               |
| ≥30%                          | 0.46 (0.29 to 0.69) [p<0.001]                            |                               |                               |                               |
| Tree canopy (ref: 0-9%)       |                                                          |                               |                               |                               |
| 10-19%                        |                                                          | 0.92 (0.75 to 1.11) [p=0.18]  |                               |                               |
| 20-29%                        |                                                          | 0.76 (0.60 to 0.95) [p=0.009] |                               |                               |
| ≥30%                          |                                                          | 0.69 (0.54 to 0.88) [p=0.002] |                               |                               |
| Grass (ref: 0-4%)             |                                                          |                               |                               |                               |
| 5-9%                          |                                                          |                               | 0.89 (0.71 to 1.11) [p=0.14]  |                               |
| 10-19%                        |                                                          |                               | 1.05 (0.81 to 1.33) [p=0.38]  |                               |
| 20-29%                        |                                                          |                               | 1.07 (0.81 to 1.39) [p=0.35]  |                               |
| ≥30%                          |                                                          |                               | 0.90 (0.59 to 1.30) [p=0.27]  |                               |
| Low-lying vegetation (0-4%)   |                                                          |                               |                               |                               |
| 5-9%                          |                                                          |                               |                               | 1.06 (0.92 to 1.22) [p=0.21]  |
| ≥10%                          |                                                          |                               |                               | 1.11 (0.77 to 1.51) [p=0.30]  |
| Age group (ref: 45-54y)       |                                                          |                               |                               |                               |
| 55-64y                        | 0.59 (0.51 to 0.69) [p<0.001]                            | 0.60 (0.51 to 0.70) [p<0.001] | 0.59 (0.51 to 0.69) [p<0.001] | 0.59 (0.51 to 0.69) [p<0.001] |

|                                               |                               |                               |                               |                               |
|-----------------------------------------------|-------------------------------|-------------------------------|-------------------------------|-------------------------------|
| 65-74y                                        | 0.50 (0.39 to 0.63) [p<0.001] | 0.51 (0.40 to 0.64) [p<0.001] | 0.51 (0.40 to 0.63) [p<0.001] | 0.50 (0.40 to 0.63) [p<0.001] |
| ≥75y                                          | 0.62 (0.46 to 0.81) [p<0.001] | 0.64 (0.48 to 0.84) [p=0.001] | 0.63 (0.47 to 0.82) [p=0.001] | 0.63 (0.47 to 0.81) [p<0.001] |
|                                               |                               |                               |                               |                               |
| Gender (ref: Male)                            |                               |                               |                               |                               |
| Female                                        | 1.14 (0.99 to 1.30) [p=0.033] | 1.15 (1.00 to 1.31) [p=0.025] | 1.14 (0.99 to 1.30) [p=0.033] | 1.14 (0.99 to 1.30) [p=0.033] |
|                                               |                               |                               |                               |                               |
| Annual household income (ref: \$0-\$19,999)   |                               |                               |                               |                               |
| \$20,000-\$29,999                             | 0.97 (0.73 to 1.26) [p=0.39]  | 0.98 (0.74 to 1.27) [p=0.41]  | 0.96 (0.72 to 1.26) [p=0.35]  | 0.97 (0.73 to 1.26) [p=0.373] |
| \$30,000-\$39,999                             | 0.74 (0.54 to 0.99) [p=0.020] | 0.76 (0.55 to 1.01) [p=0.029] | 0.74 (0.54 to 0.98) [p=0.020] | 0.74 (0.54 to 0.99) [p=0.020] |
| \$40,000-\$49,999                             | 0.87 (0.65 to 1.14) [p=0.146] | 0.88 (0.66 to 1.16) [p=0.18]  | 0.86 (0.64 to 1.13) [p=0.127] | 0.86 (0.64 to 1.13) [p=0.139] |
| \$50,000-\$69,999                             | 0.65 (0.49 to 0.84) [p=0.001] | 0.67 (0.51 to 0.87) [p=0.001] | 0.65 (0.49 to 0.84) [p=0.001] | 0.65 (0.49 to 0.85) [p=0.001] |
| \$70,000+                                     | 0.52 (0.40 to 0.66) [p<0.001] | 0.54 (0.42 to 0.69) [p<0.001] | 0.52 (0.41 to 0.66) [p<0.001] | 0.52 (0.41 to 0.66) [p<0.001] |
| Not stated                                    | 0.78 (0.62 to 0.97) [p=0.015] | 0.80 (0.63 to 1.00) [p=0.023] | 0.78 (0.61 to 0.97) [p=0.014] | 0.78 (0.62 to 0.98) [p=0.015] |
|                                               |                               |                               |                               |                               |
| Highest educational qualification (ref: None) |                               |                               |                               |                               |
| School                                        | 0.65 (0.51 to 0.84) [p=0.001] | 0.68 (0.52 to 0.86) [p=0.001] | 0.66 (0.51 to 0.84) [p=0.001] | 0.65 (0.50 to 0.84) [p=0.001] |
| High school                                   | 0.56 (0.41 to 0.75) [p<0.001] | 0.59 (0.43 to 0.78) [p<0.001] | 0.57 (0.42 to 0.75) [p<0.001] | 0.56 (0.42 to 0.75) [p<0.001] |
| Trade                                         | 0.69 (0.51 to 0.91) [p=0.005] | 0.71 (0.52 to 0.93) [p=0.008] | 0.69 (0.51 to 0.91) [p=0.004] | 0.68 (0.51 to 0.92) [p=0.006] |
| Certificate/Diploma                           | 0.63 (0.49 to 0.80) [p<0.001] | 0.66 (0.51 to 0.83) [p<0.001] | 0.63 (0.49 to 0.81) [p<0.001] | 0.62 (0.48 to 0.81) [p<0.001] |
| University                                    | 0.49 (0.38 to 0.63) [p<0.001] | 0.52 (0.41 to 0.67) [p<0.001] | 0.50 (0.39 to 0.64) [p<0.001] | 0.50 (0.38 to 0.64) [p<0.001] |
| Not stated                                    | 0.78 (0.37 to 1.37) [p=0.18]  | 0.82 (0.39 to 1.44) [p=0.23]  | 0.80 (0.38 to 1.41) [p=0.20]  | 0.79 (0.38 to 1.40) [p=0.19]  |
|                                               |                               |                               |                               |                               |
| Economic status (ref: Employed)               |                               |                               |                               |                               |
| Retired                                       | 0.97 (0.79 to 1.19) [p=0.38]  | 0.98 (0.80 to 1.19) [p=0.40]  | 0.97 (0.79 to 1.18) [p=0.36]  | 0.97 (0.79 to 1.17) [p=0.36]  |
| Unemployed                                    | 2.15 (1.43 to 3.08) [p<0.001] | 2.17 (1.43 to 3.11) [p<0.001] | 2.15 (1.40 to 3.07) [p<0.001] | 2.16 (1.41 to 3.10) [p<0.001] |
| Unpaid work                                   | 0.90 (0.47 to 1.47) [p=0.31]  | 0.90 (0.47 to 1.50) [p=0.33]  | 0.90 (0.47 to 1.48) [p=0.33]  | 0.89 (0.46 to 1.47) [p=0.31]  |
| Disabled                                      | 2.59 (1.63 to 3.82) [p<0.001] | 2.64 (1.65 to 3.93) [p<0.001] | 2.62 (1.63 to 3.87) [p<0.001] | 2.64 (1.66 to 3.92) [p<0.001] |
| Homemaker                                     | 1.09 (0.76 to 1.50) [p=0.33]  | 1.11 (0.77 to 1.51) [p=0.31]  | 1.10 (0.77 to 1.49) [p=0.32]  | 1.09 (0.76 to 1.49) [p=0.33]  |
| Other (e.g. study)                            | 1.68 (0.97 to 2.62) [p=0.033] | 1.70 (0.98 to 2.66) [p=0.028] | 1.67 (0.95 to 2.60) [p=0.035] | 1.67 (0.95 to 2.63) [p=0.038] |
|                                               |                               |                               |                               |                               |
| Couple status (ref: Not in a couple)          |                               |                               |                               |                               |

|             |                               |                               |                               |                               |
|-------------|-------------------------------|-------------------------------|-------------------------------|-------------------------------|
| In a couple | 0.88 (0.75 to 1.02) [p=0.045] | 0.87 (0.75 to 1.01) [p=0.035] | 0.86 (0.74 to 0.99) [p=0.020] | 0.86 (0.73 to 1.00) [p=0.025] |
|             |                               |                               |                               |                               |
|             |                               |                               |                               |                               |

eTable 6: Associations between total green space, green space type, and prevalent self-reported physician-diagnosed depression or anxiety adjusted for confounding in multilevel logistic regressions estimated with Markov Chain Monte Carlo (MCMC)

|                               | Self-reported physician-diagnosed depression or anxiety (prevalence) |                               |                               |                               |
|-------------------------------|----------------------------------------------------------------------|-------------------------------|-------------------------------|-------------------------------|
|                               | Model 9                                                              | Model 10                      | Model 11                      | Model 12                      |
|                               | Total green space                                                    | Tree canopy                   | Grass                         | Low-lying vegetation          |
|                               | Odds Ratio (95% Confidence Interval) [p-value]                       |                               |                               |                               |
| Total green space (ref: 0-4%) |                                                                      |                               |                               |                               |
| 5-9%                          | 0.94 (0.75 to 1.16) [p=0.27]                                         |                               |                               |                               |
| 10-19%                        | 0.92 (0.73 to 1.14) [p=0.21]                                         |                               |                               |                               |
| 20-29%                        | 0.95 (0.75 to 1.18) [p=0.30]                                         |                               |                               |                               |
| ≥30%                          | 0.93 (0.74 to 1.16) [p=0.26]                                         |                               |                               |                               |
|                               |                                                                      |                               |                               |                               |
| Tree canopy (ref: 0-9%)       |                                                                      |                               |                               |                               |
| 10-19%                        |                                                                      | 1.01 (0.92 to 1.10) [p=0.42]  |                               |                               |
| 20-29%                        |                                                                      | 1.00 (0.90 to 1.11) [p=0.48]  |                               |                               |
| ≥30%                          |                                                                      | 0.97 (0.86 to 1.09) [p=0.29]  |                               |                               |
|                               |                                                                      |                               |                               |                               |
| Grass (ref: 0-4%)             |                                                                      |                               |                               |                               |
| 5-9%                          |                                                                      |                               | 0.98 (0.90 to 1.07) [p=0.33]  |                               |
| 10-19%                        |                                                                      |                               | 0.98 (0.87 to 1.09) [p=0.36]  |                               |
| 20-29%                        |                                                                      |                               | 1.01 (0.89 to 1.14) [p=0.43]  |                               |
| ≥30%                          |                                                                      |                               | 1.12 (0.94 to 1.32) [p=0.10]  |                               |
|                               |                                                                      |                               |                               |                               |
| Low-lying vegetation (0-4%)   |                                                                      |                               |                               |                               |
| 5-9%                          |                                                                      |                               |                               | 1.04 (0.98 to 1.11) [p=0.08]  |
| ≥10%                          |                                                                      |                               |                               | 0.97 (0.83 to 1.12) [p=0.36]  |
|                               |                                                                      |                               |                               |                               |
| Age group (ref: 45-54y)       |                                                                      |                               |                               |                               |
| 55-64y                        | 0.81 (0.76 to 0.86) [p<0.001]                                        | 0.81 (0.76 to 0.86) [p<0.001] | 0.81 (0.76 to 0.86) [p<0.001] | 0.81 (0.76 to 0.86) [p<0.001] |

|                                               |                               |                               |                               |                               |
|-----------------------------------------------|-------------------------------|-------------------------------|-------------------------------|-------------------------------|
| 65-74y                                        | 0.55 (0.50 to 0.61) [p<0.001] | 0.55 (0.50 to 0.60) [p<0.001] | 0.55 (0.50 to 0.60) [p<0.001] | 0.55 (0.50 to 0.60) [p<0.001] |
| ≥75y                                          | 0.36 (0.31 to 0.40) [p<0.001] | 0.36 (0.32 to 0.40) [p<0.001] | 0.36 (0.32 to 0.40) [p<0.001] | 0.36 (0.32 to 0.40) [p<0.001] |
|                                               |                               |                               |                               |                               |
| Gender (ref: Male)                            |                               |                               |                               |                               |
| Female                                        | 1.75 (1.66 to 1.86) [p<0.001] | 1.75 (1.65 to 1.85) [p<0.001] | 1.75 (1.66 to 1.85) [p<0.001] | 1.75 (1.65 to 1.85) [p<0.001] |
|                                               |                               |                               |                               |                               |
| Annual household income (ref: \$0-\$19,999)   |                               |                               |                               |                               |
| \$20,000-\$29,999                             | 0.93 (0.83 to 1.05) [p=0.13]  | 0.94 (0.83 to 1.05) [p=0.12]  | 0.94 (0.83 to 1.05) [p=0.13]  | 0.94 (0.83 to 1.05) [p=0.13]  |
| \$30,000-\$39,999                             | 0.92 (0.81 to 1.03) [p=0.08]  | 0.92 (0.81 to 1.03) [p=0.07]  | 0.92 (0.81 to 1.04) [p=0.08]  | 0.92 (0.81 to 1.03) [p=0.08]  |
| \$40,000-\$49,999                             | 0.82 (0.73 to 0.93) [p=0.001] | 0.82 (0.73 to 0.93) [p=0.001] | 0.82 (0.73 to 0.93) [p=0.001] | 0.83 (0.73 to 0.93) [p=0.002] |
| \$50,000-\$69,999                             | 0.84 (0.75 to 0.94) [p=0.001] | 0.84 (0.75 to 0.94) [p=0.001] | 0.84 (0.75 to 0.94) [p=0.002] | 0.84 (0.75 to 0.94) [p=0.001] |
| \$70,000+                                     | 0.79 (0.71 to 0.87) [p<0.001] | 0.79 (0.71 to 0.87) [p<0.001] | 0.79 (0.71 to 0.88) [p<0.001] | 0.79 (0.71 to 0.88) [p<0.001] |
| Not stated                                    | 0.69 (0.63 to 0.76) [p<0.001] | 0.69 (0.63 to 0.76) [p<0.001] | 0.69 (0.63 to 0.76) [p<0.001] | 0.69 (0.63 to 0.76) [p<0.001] |
|                                               |                               |                               |                               |                               |
| Highest educational qualification (ref: None) |                               |                               |                               |                               |
| School                                        | 0.85 (0.75 to 0.95) [p=0.002] | 0.85 (0.76 to 0.94) [p=0.001] | 0.85 (0.76 to 0.95) [p=0.003] | 0.84 (0.75 to 0.94) [p=0.003] |
| High school                                   | 0.87 (0.76 to 0.99) [p=0.016] | 0.87 (0.76 to 0.98) [p=0.014] | 0.87 (0.77 to 0.99) [p=0.019] | 0.87 (0.76 to 0.99) [p=0.015] |
| Trade                                         | 0.83 (0.72 to 0.95) [p=0.004] | 0.83 (0.73 to 0.95) [p=0.003] | 0.84 (0.73 to 0.95) [p=0.005] | 0.83 (0.72 to 0.95) [p=0.004] |
| Certificate/Diploma                           | 0.98 (0.87 to 1.10) [p=0.34]  | 0.98 (0.87 to 1.09) [p=0.35]  | 0.98 (0.88 to 1.10) [p=0.37]  | 0.97 (0.87 to 1.09) [p=0.31]  |
| University                                    | 0.94 (0.84 to 1.06) [p=0.16]  | 0.95 (0.84 to 1.06) [p=0.17]  | 0.95 (0.85 to 1.07) [p=0.19]  | 0.94 (0.84 to 1.06) [p=0.15]  |
| Not stated                                    | 1.00 (0.75 to 1.30) [p=0.48]  | 1.00 (0.76 to 1.29) [p=0.48]  | 1.00 (0.75 to 1.30) [p=0.48]  | 0.99 (0.75 to 1.29) [p=0.46]  |
|                                               |                               |                               |                               |                               |
| Economic status (ref: Employed)               |                               |                               |                               |                               |
| Retired                                       | 1.30 (1.20 to 1.40) [p<0.001] | 1.30 (1.20 to 1.40) [p<0.001] | 1.30 (1.20 to 1.40) [p<0.001] | 1.29 (1.20 to 1.40) [p<0.001] |
| Unemployed                                    | 1.85 (1.53 to 2.20) [p<0.001] | 1.85 (1.54 to 2.21) [p<0.001] | 1.85 (1.53 to 2.21) [p<0.001] | 1.85 (1.54 to 2.21) [p<0.001] |
| Unpaid work                                   | 1.28 (1.03 to 1.55) [p=0.013] | 1.28 (1.04 to 1.55) [p=0.010] | 1.28 (1.03 to 1.55) [p=0.012] | 1.28 (1.03 to 1.55) [p=0.013] |
| Disabled                                      | 4.46 (3.70 to 5.33) [p<0.001] | 4.47 (3.71 to 5.33) [p<0.001] | 4.46 (3.70 to 5.33) [p<0.001] | 4.45 (3.70 to 5.30) [p<0.001] |
| Homemaker                                     | 1.24 (1.07 to 1.41) [p=0.002] | 1.24 (1.07 to 1.42) [p=0.001] | 1.24 (1.07 to 1.42) [p=0.001] | 1.24 (1.07 to 1.41) [p=0.002] |
| Other (e.g. study)                            | 1.47 (1.17 to 1.82) [p<0.001] | 1.47 (1.18 to 1.81) [p<0.001] | 1.47 (1.17 to 1.82) [p<0.001] | 1.47 (1.17 to 1.81) [p=0.001] |
|                                               |                               |                               |                               |                               |



|                                      |                               |                               |                               |                               |
|--------------------------------------|-------------------------------|-------------------------------|-------------------------------|-------------------------------|
| Couple status (ref: Not in a couple) |                               |                               |                               |                               |
| In a couple                          | 0.63 (0.59 to 0.67) [p<0.001] | 0.63 (0.59 to 0.67) [p<0.001] | 0.63 (0.59 to 0.67) [p<0.001] | 0.63 (0.59 to 0.67) [p<0.001] |
|                                      |                               |                               |                               |                               |
|                                      |                               |                               |                               |                               |

eTable 7: Associations between total green space, green space type, and incident self-reported physician-diagnosed depression or anxiety adjusted for confounding in multilevel logistic regressions estimated with Markov Chain Monte Carlo (MCMC)

| Self-reported physician-diagnosed depression or anxiety (incidence) |                               |                               |                               |                               |
|---------------------------------------------------------------------|-------------------------------|-------------------------------|-------------------------------|-------------------------------|
|                                                                     | Model 13                      | Model 14                      | Model 15                      | Model 16                      |
|                                                                     | Total green space             | Tree canopy                   | Grass                         | Low-lying vegetation          |
| Odds Ratio (95% Confidence Interval) [p-value]                      |                               |                               |                               |                               |
| Total green space (ref: 0-4%)                                       |                               |                               |                               |                               |
| 5-9%                                                                | 1.37 (0.99 to 1.88) [p=0.027] |                               |                               |                               |
| 10-19%                                                              | 1.30 (0.94 to 1.78) [p=0.06]  |                               |                               |                               |
| 20-29%                                                              | 1.42 (1.03 to 1.94) [p=0.014] |                               |                               |                               |
| ≥30%                                                                | 1.21 (0.87 to 1.67) [p=0.14]  |                               |                               |                               |
|                                                                     |                               |                               |                               |                               |
| Tree canopy (ref: 0-9%)                                             |                               |                               |                               |                               |
| 10-19%                                                              |                               | 0.97 (0.86 to 1.10) [p=0.67]  |                               |                               |
| 20-29%                                                              |                               | 0.85 (0.74 to 0.98) [p=0.029] |                               |                               |
| ≥30%                                                                |                               | 0.86 (0.74 to 1.00) [p=0.05]  |                               |                               |
|                                                                     |                               |                               |                               |                               |
| Grass (ref: 0-4%)                                                   |                               |                               |                               |                               |
| 5-9%                                                                |                               |                               | 0.96 (0.84 to 1.10) [p=0.28]  |                               |
| 10-19%                                                              |                               |                               | 1.06 (0.91 to 1.24) [p=0.23]  |                               |
| 20-29%                                                              |                               |                               | 1.08 (0.90 to 1.28) [p=0.22]  |                               |
| ≥30%                                                                |                               |                               | 1.13 (0.88 to 1.43) [p=0.17]  |                               |
|                                                                     |                               |                               |                               |                               |
| Low-lying vegetation (0-4%)                                         |                               |                               |                               |                               |
| 5-9%                                                                |                               |                               |                               | 1.02 (0.94 to 1.12) [p=0.31]  |
| ≥10%                                                                |                               |                               |                               | 1.04 (0.83 to 1.28) [p=0.39]  |
|                                                                     |                               |                               |                               |                               |
| Age group (ref: 45-54y)                                             |                               |                               |                               |                               |
| 55-64y                                                              | 0.67 (0.61 to 0.74) [p<0.001] | 0.68 (0.61 to 0.74) [p<0.001] | 0.68 (0.61 to 0.74) [p<0.001] | 0.67 (0.61 to 0.74) [p<0.001] |

|                                               |                               |                               |                               |                               |
|-----------------------------------------------|-------------------------------|-------------------------------|-------------------------------|-------------------------------|
| 65-74y                                        | 0.50 (0.43 to 0.58) [p<0.001] | 0.50 (0.43 to 0.58) [p<0.001] | 0.50 (0.43 to 0.58) [p<0.001] | 0.50 (0.43 to 0.57) [p<0.001] |
| ≥75y                                          | 0.49 (0.41 to 0.58) [p<0.001] | 0.50 (0.42 to 0.59) [p<0.001] | 0.50 (0.42 to 0.58) [p<0.001] | 0.49 (0.41 to 0.58) [p<0.001] |
|                                               |                               |                               |                               |                               |
| Gender (ref: Male)                            |                               |                               |                               |                               |
| Female                                        | 1.38 (1.27 to 1.50) [p<0.001] | 1.38 (1.27 to 1.50) [p<0.001] | 1.38 (1.27 to 1.50) [p<0.001] | 1.38 (1.27 to 1.50) [p<0.001] |
|                                               |                               |                               |                               |                               |
| Annual household income (ref: \$0-\$19,999)   |                               |                               |                               |                               |
| \$20,000-\$29,999                             | 1.00 (0.83 to 1.19) [p=0.47]  | 1.00 (0.83 to 1.20) [p=0.99]  | 1.00 (0.83 to 1.19) [p=0.48]  | 1.00 (0.83 to 1.19) [p=0.48]  |
| \$30,000-\$39,999                             | 0.97 (0.79 to 1.16) [p=0.355] | 0.97 (0.80 to 1.17) [p=0.76]  | 0.97 (0.80 to 1.17) [p=0.37]  | 0.97 (0.80 to 1.16) [p=0.36]  |
| \$40,000-\$49,999                             | 0.87 (0.71 to 1.05) [p=0.07]  | 0.87 (0.72 to 1.06) [p=0.17]  | 0.87 (0.71 to 1.05) [p=0.08]  | 0.87 (0.71 to 1.05) [p=0.071] |
| \$50,000-\$69,999                             | 1.04 (0.87 to 1.22) [p=0.36]  | 1.03 (0.87 to 1.22) [p=0.69]  | 1.04 (0.88 to 1.22) [p=0.341] | 1.04 (0.87 to 1.22) [p=0.35]  |
| \$70,000+                                     | 0.85 (0.73 to 0.99) [p=0.021] | 0.85 (0.73 to 1.00) [p=0.048] | 0.86 (0.73 to 1.00) [p=0.023] | 0.85 (0.73 to 0.99) [p=0.019] |
| Not stated                                    | 1.14 (0.99 to 1.31) [p=0.039] | 1.14 (0.99 to 1.31) [p=0.08]  | 1.14 (0.99 to 1.31) [p=0.031] | 1.14 (0.99 to 1.31) [p=0.038] |
|                                               |                               |                               |                               |                               |
| Highest educational qualification (ref: None) |                               |                               |                               |                               |
| School                                        | 0.77 (0.65 to 0.91) [p=0.001] | 0.77 (0.66 to 0.91) [p=0.002] | 0.77 (0.65 to 0.91) [p=0.001] | 0.77 (0.65 to 0.90) [p<0.001] |
| High school                                   | 0.68 (0.56 to 0.81) [p<0.001] | 0.67 (0.56 to 0.81) [p<0.001] | 0.68 (0.55 to 0.81) [p<0.001] | 0.67 (0.55 to 0.80) [p<0.001] |
| Trade                                         | 0.77 (0.64 to 0.93) [p=0.003] | 0.77 (0.64 to 0.93) [p=0.007] | 0.77 (0.64 to 0.93) [p=0.003] | 0.77 (0.63 to 0.92) [p=0.002] |
| Certificate/Diploma                           | 0.75 (0.64 to 0.88) [p<0.001] | 0.76 (0.64 to 0.89) [p=0.001] | 0.75 (0.64 to 0.88) [p<0.001] | 0.75 (0.63 to 0.87) [p<0.001] |
| University                                    | 0.67 (0.57 to 0.79) [p<0.001] | 0.67 (0.57 to 0.79) [p<0.001] | 0.67 (0.57 to 0.79) [p<0.001] | 0.67 (0.56 to 0.78) [p<0.001] |
| Not stated                                    | 0.86 (0.56 to 1.23) [p=0.20]  | 0.85 (0.58 to 1.25) [p=0.41]  | 0.85 (0.55 to 1.22) [p=0.18]  | 0.85 (0.56 to 1.23) [p=0.18]  |
|                                               |                               |                               |                               |                               |
| Economic status (ref: Employed)               |                               |                               |                               |                               |
| Retired                                       | 1.18 (1.05 to 1.33) [p=0.003] | 1.19 (1.05 to 1.33) [p=0.005] | 1.18 (1.05 to 1.33) [p=0.003] | 1.19 (1.05 to 1.33) [p=0.003] |
| Unemployed                                    | 1.46 (1.07 to 1.92) [p=0.008] | 1.45 (1.08 to 1.94) [p=0.012] | 1.47 (1.07 to 1.93) [p=0.009] | 1.47 (1.07 to 1.94) [p=0.010] |
| Unpaid work                                   | 1.35 (0.99 to 1.77) [p=0.028] | 1.35 (1.01 to 1.81) [p=0.042] | 1.36 (1.00 to 1.79) [p=0.025] | 1.36 (1.00 to 1.78) [p=0.024] |
| Disabled                                      | 2.29 (1.62 to 3.09) [p<0.001] | 2.26 (1.63 to 3.12) [p<0.001] | 2.28 (1.61 to 3.11) [p<0.001] | 2.30 (1.62 to 3.10) [p<0.001] |
| Homemaker                                     | 1.05 (0.84 to 1.28) [p=0.35]  | 1.05 (0.85 to 1.29) [p=0.67]  | 1.05 (0.84 to 1.28) [p=0.35]  | 1.05 (0.84 to 1.28) [p=0.35]  |
| Other (e.g. study)                            | 1.48 (1.06 to 1.99) [p=0.011] | 1.48 (1.09 to 2.01) [p=0.013] | 1.48 (1.07 to 1.98) [p=0.011] | 1.49 (1.07 to 1.98) [p=0.009] |
|                                               |                               |                               |                               |                               |

|                                      |                               |                               |                               |                               |
|--------------------------------------|-------------------------------|-------------------------------|-------------------------------|-------------------------------|
| Couple status (ref: Not in a couple) |                               |                               |                               |                               |
| In a couple                          | 0.84 (0.76 to 0.92) [p<0.001] | 0.84 (0.77 to 0.93) [p<0.001] | 0.83 (0.76 to 0.91) [p<0.001] | 0.84 (0.76 to 0.92) [p<0.001] |
|                                      |                               |                               |                               |                               |
|                                      |                               |                               |                               |                               |

eTable 8: Associations between total green space, green space type, and prevalent missing self-rated fair or poor general health adjusted for confounding in multilevel logistic regressions estimated with Markov Chain Monte Carlo (MCMC)

|                               | Self-rated fair-to-poor general health (prevalence) |                               |                               |                               |
|-------------------------------|-----------------------------------------------------|-------------------------------|-------------------------------|-------------------------------|
|                               | Model 17                                            | Model 18                      | Model 19                      | Model 20                      |
|                               | Total green space                                   | Tree canopy                   | Grass                         | Low-lying vegetation          |
|                               | Odds Ratio (95% Confidence Interval) [p-value]      |                               |                               |                               |
| Total green space (ref: 0-4%) |                                                     |                               |                               |                               |
| 5-9%                          | 0.76 (0.57 to 1.00) [p=0.023]                       |                               |                               |                               |
| 10-19%                        | 0.75 (0.56 to 0.97) [p=0.015]                       |                               |                               |                               |
| 20-29%                        | 0.74 (0.55 to 0.97) [p=0.014]                       |                               |                               |                               |
| ≥30%                          | 0.63 (0.46 to 0.83) [p=0.001]                       |                               |                               |                               |
| Tree canopy (ref: 0-9%)       |                                                     |                               |                               |                               |
| 10-19%                        |                                                     | 0.94 (0.84 to 1.05) [p=0.17]  |                               |                               |
| 20-29%                        |                                                     | 0.77 (0.67 to 0.88) [p<0.001] |                               |                               |
| ≥30%                          |                                                     | 0.66 (0.56 to 0.78) [p<0.001] |                               |                               |
| Grass (ref: 0-4%)             |                                                     |                               |                               |                               |
| 5-9%                          |                                                     |                               | 1.05 (0.91 to 1.20) [p=0.28]  |                               |
| 10-19%                        |                                                     |                               | 1.16 (0.96 to 1.36) [p=0.06]  |                               |
| 20-29%                        |                                                     |                               | 1.24 (1.00 to 1.51) [p=0.026] |                               |
| ≥30%                          |                                                     |                               | 1.40 (1.07 to 1.78) [p=0.006] |                               |
| Low-lying vegetation (0-4%)   |                                                     |                               |                               |                               |
| 5-9%                          |                                                     |                               |                               | 0.95 (0.87 to 1.04) [p=0.14]  |
| ≥10%                          |                                                     |                               |                               | 1.11 (0.91 to 1.35) [p=0.15]  |
| Age group (ref: 45-54y)       |                                                     |                               |                               |                               |
| 55-64y                        | 0.80 (0.73 to 0.88) [p<0.001]                       | 0.80 (0.73 to 0.88) [p<0.001] | 0.80 (0.73 to 0.88) [p<0.001] | 0.80 (0.73 to 0.88) [p<0.001] |

|                                               |                                 |                                 |                                 |                                 |
|-----------------------------------------------|---------------------------------|---------------------------------|---------------------------------|---------------------------------|
| 65-74y                                        | 0.72 (0.63 to 0.81) [p<0.001]   | 0.72 (0.64 to 0.82) [p<0.001]   | 0.72 (0.63 to 0.81) [p<0.001]   | 0.72 (0.63 to 0.81) [p<0.001]   |
| ≥75y                                          | 0.87 (0.76 to 1.00) [p=0.023]   | 0.88 (0.76 to 1.00) [p=0.029]   | 0.87 (0.76 to 1.00) [p=0.024]   | 0.87 (0.76 to 1.00) [p=0.025]   |
|                                               |                                 |                                 |                                 |                                 |
| Gender (ref: Male)                            |                                 |                                 |                                 |                                 |
| Female                                        | 0.79 (0.74 to 0.85) [p<0.001]   | 0.79 (0.74 to 0.85) [p<0.001]   | 0.79 (0.74 to 0.85) [p<0.001]   | 0.79 (0.74 to 0.85) [p<0.001]   |
|                                               |                                 |                                 |                                 |                                 |
| Annual household income (ref: \$0-\$19,999)   |                                 |                                 |                                 |                                 |
| \$20,000-\$29,999                             | 0.74 (0.65 to 0.84) [p<0.001]   | 0.74 (0.65 to 0.84) [p<0.001]   | 0.74 (0.65 to 0.84) [p<0.001]   | 0.74 (0.64 to 0.84) [p<0.001]   |
| \$30,000-\$39,999                             | 0.56 (0.48 to 0.65) [p<0.001]   | 0.56 (0.48 to 0.65) [p<0.001]   | 0.56 (0.48 to 0.64) [p<0.001]   | 0.56 (0.48 to 0.64) [p<0.001]   |
| \$40,000-\$49,999                             | 0.58 (0.49 to 0.68) [p<0.001]   | 0.58 (0.50 to 0.68) [p<0.001]   | 0.58 (0.49 to 0.67) [p<0.001]   | 0.58 (0.50 to 0.67) [p<0.001]   |
| \$50,000-\$69,999                             | 0.53 (0.45 to 0.60) [p<0.001]   | 0.53 (0.46 to 0.61) [p<0.001]   | 0.53 (0.46 to 0.60) [p<0.001]   | 0.53 (0.46 to 0.60) [p<0.001]   |
| \$70,000+                                     | 0.44 (0.39 to 0.50) [p<0.001]   | 0.44 (0.39 to 0.51) [p<0.001]   | 0.44 (0.39 to 0.50) [p<0.001]   | 0.44 (0.39 to 0.50) [p<0.001]   |
| Not stated                                    | 0.70 (0.63 to 0.78) [p<0.001]   | 0.70 (0.63 to 0.78) [p<0.001]   | 0.70 (0.63 to 0.78) [p<0.001]   | 0.70 (0.63 to 0.78) [p<0.001]   |
|                                               |                                 |                                 |                                 |                                 |
| Highest educational qualification (ref: None) |                                 |                                 |                                 |                                 |
| School                                        | 0.73 (0.65 to 0.83) [p<0.001]   | 0.74 (0.66 to 0.84) [p<0.001]   | 0.74 (0.65 to 0.84) [p<0.001]   | 0.74 (0.65 to 0.83) [p<0.001]   |
| High school                                   | 0.80 (0.69 to 0.93) [p=0.001]   | 0.82 (0.70 to 0.95) [p=0.005]   | 0.81 (0.70 to 0.94) [p=0.003]   | 0.81 (0.70 to 0.93) [p=0.001]   |
| Trade                                         | 0.72 (0.62 to 0.84) [p<0.001]   | 0.74 (0.64 to 0.85) [p<0.001]   | 0.73 (0.63 to 0.84) [p<0.001]   | 0.73 (0.63 to 0.84) [p<0.001]   |
| Certificate/Diploma                           | 0.60 (0.52 to 0.68) [p<0.001]   | 0.61 (0.54 to 0.69) [p<0.001]   | 0.60 (0.53 to 0.69) [p<0.001]   | 0.60 (0.52 to 0.68) [p<0.001]   |
| University                                    | 0.55 (0.48 to 0.63) [p<0.001]   | 0.56 (0.49 to 0.64) [p<0.001]   | 0.56 (0.48 to 0.64) [p<0.001]   | 0.55 (0.48 to 0.63) [p<0.001]   |
| Not stated                                    | 0.85 (0.61 to 1.14) [p=0.13]    | 0.86 (0.62 to 1.16) [p=0.16]    | 0.85 (0.61 to 1.14) [p=0.14]    | 0.85 (0.61 to 1.14) [p=0.13]    |
|                                               |                                 |                                 |                                 |                                 |
| Economic status (ref: Employed)               |                                 |                                 |                                 |                                 |
| Retired                                       | 1.51 (1.35 to 1.67) [p<0.001]   | 1.51 (1.35 to 1.68) [p<0.001]   | 1.51 (1.36 to 1.67) [p<0.001]   | 1.51 (1.36 to 1.68) [p<0.001]   |
| Unemployed                                    | 2.66 (2.14 to 3.26) [p<0.001]   | 2.67 (2.15 to 3.27) [p<0.001]   | 2.67 (2.15 to 3.25) [p<0.001]   | 2.66 (2.14 to 3.26) [p<0.001]   |
| Unpaid work                                   | 1.19 (0.86 to 1.58) [p=0.15]    | 1.20 (0.88 to 1.58) [p=0.13]    | 1.20 (0.87 to 1.58) [p=0.13]    | 1.20 (0.87 to 1.59) [p=0.14]    |
| Disabled                                      | 11.87 (9.71 to 14.33) [p<0.001] | 11.86 (9.70 to 14.38) [p<0.001] | 11.97 (9.77 to 14.49) [p<0.001] | 11.98 (9.79 to 14.48) [p<0.001] |
| Homemaker                                     | 1.70 (1.41 to 2.01) [p<0.001]   | 1.71 (1.42 to 2.03) [p<0.001]   | 1.70 (1.42 to 2.02) [p<0.001]   | 1.70 (1.41 to 2.03) [p<0.001]   |
| Other (e.g. study)                            | 2.03 (1.56 to 2.57) [p<0.001]   | 2.04 (1.57 to 2.60) [p<0.001]   | 2.04 (1.57 to 2.60) [p<0.001]   | 2.04 (1.57 to 2.58) [p<0.001]   |
|                                               |                                 |                                 |                                 |                                 |

|                                      |                               |                               |                               |                               |
|--------------------------------------|-------------------------------|-------------------------------|-------------------------------|-------------------------------|
| Couple status (ref: Not in a couple) |                               |                               |                               |                               |
| In a couple                          | 0.74 (0.69 to 0.80) [p<0.001] | 0.75 (0.69 to 0.81) [p<0.001] | 0.74 (0.68 to 0.80) [p<0.001] | 0.74 (0.68 to 0.80) [p<0.001] |
|                                      |                               |                               |                               |                               |
|                                      |                               |                               |                               |                               |

eTable 9: Associations between total green space, green space type, and incident missing self-rated fair or poor general health adjusted for confounding in multilevel logistic regressions estimated with Markov Chain Monte Carlo (MCMC)

|                               | Self-rated fair-to-poor general health (incidence) |                               |                               |                              |
|-------------------------------|----------------------------------------------------|-------------------------------|-------------------------------|------------------------------|
|                               | Model 21                                           | Model 22                      | Model 23                      | Model 24                     |
|                               | Total green space                                  | Tree canopy                   | Grass                         | Low-lying vegetation         |
|                               | Odds Ratio (95% Confidence Interval) [p-value]     |                               |                               |                              |
| Total green space (ref: 0-4%) |                                                    |                               |                               |                              |
| 5-9%                          | 1.55 (1.01 to 2.34) [p=0.023]                      |                               |                               |                              |
| 10-19%                        | 1.60 (1.03 to 2.43) [p=0.018]                      |                               |                               |                              |
| 20-29%                        | 1.52 (0.97 to 2.33) [p=0.034]                      |                               |                               |                              |
| ≥30%                          | 1.33 (0.84 to 2.04) [p=0.14]                       |                               |                               |                              |
|                               |                                                    |                               |                               |                              |
| Tree canopy (ref: 0-9%)       |                                                    |                               |                               |                              |
| 10-19%                        |                                                    | 0.87 (0.77 to 1.00) [p=0.025] |                               |                              |
| 20-29%                        |                                                    | 0.72 (0.62 to 0.85) [p<0.001] |                               |                              |
| ≥30%                          |                                                    | 0.67 (0.57 to 0.80) [p<0.001] |                               |                              |
|                               |                                                    |                               |                               |                              |
| Grass (ref: 0-4%)             |                                                    |                               |                               |                              |
| 5-9%                          |                                                    |                               | 1.07 (0.92 to 1.23) [p=0.19]  |                              |
| 10-19%                        |                                                    |                               | 1.31 (1.10 to 1.55) [p=0.001] |                              |
| 20-29%                        |                                                    |                               | 1.42 (1.16 to 1.71) [p<0.001] |                              |
| ≥30%                          |                                                    |                               | 1.47 (1.12 to 1.91) [p=0.002] |                              |
|                               |                                                    |                               |                               |                              |
| Low-lying vegetation (0-4%)   |                                                    |                               |                               |                              |
| 5-9%                          |                                                    |                               |                               | 1.06 (0.96 to 1.16) [p=0.12] |
| ≥10%                          |                                                    |                               |                               | 0.88 (0.69 to 1.10) [p=0.14] |
|                               |                                                    |                               |                               |                              |
| Age group (ref: 45-54y)       |                                                    |                               |                               |                              |
| 55-64y                        | 0.96 (0.86 to 1.08) [p=0.26]                       | 0.96 (0.86 to 1.07) [p=0.22]  | 0.96 (0.86 to 1.08) [p=0.24]  | 0.96 (0.86 to 1.07) [p=0.23] |



|                                               |                               |                               |                               |                               |
|-----------------------------------------------|-------------------------------|-------------------------------|-------------------------------|-------------------------------|
| 65-74y                                        | 1.31 (1.13 to 1.51) [p<0.001] | 1.31 (1.13 to 1.50) [p<0.001] | 1.31 (1.13 to 1.50) [p<0.001] | 1.31 (1.13 to 1.51) [p<0.001] |
| ≥75y                                          | 2.50 (2.13 to 2.92) [p<0.001] | 2.51 (2.15 to 2.92) [p<0.001] | 2.53 (2.16 to 2.94) [p<0.001] | 2.50 (2.14 to 2.93) [p<0.001] |
|                                               |                               |                               |                               |                               |
| Gender (ref: Male)                            |                               |                               |                               |                               |
| Female                                        | 0.77 (0.71 to 0.84) [p<0.001] | 0.77 (0.71 to 0.84) [p<0.001] | 0.77 (0.71 to 0.84) [p<0.001] | 0.77 (0.71 to 0.84) [p<0.001] |
|                                               |                               |                               |                               |                               |
| Annual household income (ref: \$0-\$19,999)   |                               |                               |                               |                               |
| \$20,000-\$29,999                             | 0.89 (0.76 to 1.03) [p=0.06]  | 0.89 (0.76 to 1.03) [p=0.06]  | 0.89 (0.76 to 1.02) [p=0.05]  | 0.89 (0.76 to 1.03) [p=0.06]  |
| \$30,000-\$39,999                             | 0.78 (0.66 to 0.92) [p=0.001] | 0.79 (0.67 to 0.92) [p=0.002] | 0.78 (0.66 to 0.92) [p=0.002] | 0.78 (0.66 to 0.92) [p=0.001] |
| \$40,000-\$49,999                             | 0.78 (0.66 to 0.93) [p=0.002] | 0.79 (0.66 to 0.93) [p=0.003] | 0.79 (0.66 to 0.93) [p=0.003] | 0.79 (0.66 to 0.93) [p=0.002] |
| \$50,000-\$69,999                             | 0.65 (0.55 to 0.76) [p<0.001] | 0.65 (0.55 to 0.76) [p<0.001] | 0.65 (0.55 to 0.77) [p<0.001] | 0.65 (0.55 to 0.76) [p<0.001] |
| \$70,000+                                     | 0.55 (0.47 to 0.64) [p<0.001] | 0.55 (0.47 to 0.64) [p<0.001] | 0.55 (0.47 to 0.64) [p<0.001] | 0.55 (0.47 to 0.63) [p<0.001] |
| Not stated                                    | 0.83 (0.72 to 0.94) [p=0.002] | 0.83 (0.73 to 0.94) [p=0.002] | 0.83 (0.73 to 0.94) [p=0.001] | 0.83 (0.73 to 0.94) [p=0.001] |
|                                               |                               |                               |                               |                               |
| Highest educational qualification (ref: None) |                               |                               |                               |                               |
| School                                        | 0.77 (0.66 to 0.89) [p<0.001] | 0.77 (0.66 to 0.90) [p<0.001] | 0.77 (0.66 to 0.89) [p<0.001] | 0.77 (0.66 to 0.89) [p<0.001] |
| High school                                   | 0.81 (0.68 to 0.97) [p=0.009] | 0.82 (0.68 to 0.97) [p=0.013] | 0.82 (0.69 to 0.98) [p=0.014] | 0.81 (0.68 to 0.97) [p=0.009] |
| Trade                                         | 0.84 (0.70 to 0.99) [p=0.018] | 0.84 (0.71 to 0.99) [p=0.019] | 0.84 (0.71 to 0.99) [p=0.019] | 0.84 (0.70 to 0.99) [p=0.021] |
| Certificate/Diploma                           | 0.68 (0.58 to 0.80) [p<0.001] | 0.69 (0.59 to 0.80) [p<0.001] | 0.69 (0.59 to 0.80) [p<0.001] | 0.68 (0.58 to 0.80) [p<0.001] |
| University                                    | 0.59 (0.50 to 0.69) [p<0.001] | 0.60 (0.51 to 0.70) [p<0.001] | 0.60 (0.51 to 0.70) [p<0.001] | 0.59 (0.50 to 0.69) [p<0.001] |
| Not stated                                    | 1.05 (0.72 to 1.44) [p=0.43]  | 1.05 (0.73 to 1.45) [p=0.41]  | 1.05 (0.72 to 1.44) [p=0.43]  | 1.04 (0.72 to 1.44) [p=0.43]  |
|                                               |                               |                               |                               |                               |
| Economic status (ref: Employed)               |                               |                               |                               |                               |
| Retired                                       | 1.21 (1.07 to 1.35) [p=0.002] | 1.21 (1.07 to 1.36) [p=0.002] | 1.21 (1.07 to 1.35) [p=0.001] | 1.20 (1.06 to 1.36) [p=0.002] |
| Unemployed                                    | 1.72 (1.26 to 2.28) [p<0.001] | 1.73 (1.26 to 2.29) [p<0.001] | 1.72 (1.27 to 2.27) [p<0.001] | 1.72 (1.25 to 2.28) [p=0.001] |
| Unpaid work                                   | 0.99 (0.68 to 1.37) [p=0.46]  | 1.00 (0.69 to 1.38) [p=0.48]  | 1.00 (0.69 to 1.39) [p=0.48]  | 1.00 (0.69 to 1.38) [p=0.47]  |
| Disabled                                      | 2.81 (1.92 to 3.94) [p<0.001] | 2.77 (1.89 to 3.87) [p<0.001] | 2.81 (1.91 to 3.92) [p<0.001] | 2.81 (1.92 to 3.92) [p<0.001] |
| Homemaker                                     | 1.24 (0.98 to 1.54) [p=0.037] | 1.25 (0.98 to 1.55) [p=0.034] | 1.24 (0.97 to 1.53) [p=0.041] | 1.24 (0.97 to 1.53) [p=0.039] |
| Other (e.g. study)                            | 1.60 (1.16 to 2.13) [p=0.002] | 1.61 (1.17 to 2.16) [p=0.002] | 1.59 (1.16 to 2.12) [p=0.002] | 1.59 (1.16 to 2.11) [p=0.002] |
|                                               |                               |                               |                               |                               |

|                                      |                               |                               |                               |                               |
|--------------------------------------|-------------------------------|-------------------------------|-------------------------------|-------------------------------|
| Couple status (ref: Not in a couple) |                               |                               |                               |                               |
| In a couple                          | 0.79 (0.72 to 0.87) [p<0.001] | 0.80 (0.73 to 0.88) [p<0.001] | 0.78 (0.71 to 0.86) [p<0.001] | 0.79 (0.72 to 0.87) [p<0.001] |
|                                      |                               |                               |                               |                               |
|                                      |                               |                               |                               |                               |
